# Supplementary material for: Moesin is involved in polarity maintenance and cortical remodeling during asymmetric cell division
Source: PubMed Central journal article supplement — Mol Biol Cell. 2018 Feb 15;29(4):419–34. doi: 10.1091/mbc.E17-05-0294 (PMC6014166; doi:10.1091/mbc.e17-05-0294), 2018-02-15
Supplement: mbc-29-419-s001.pdf [file mbc-29-419-s001.pdf]

# Supplemental Materials

*Molecular Biology of the Cell*

Abeyundara et al.

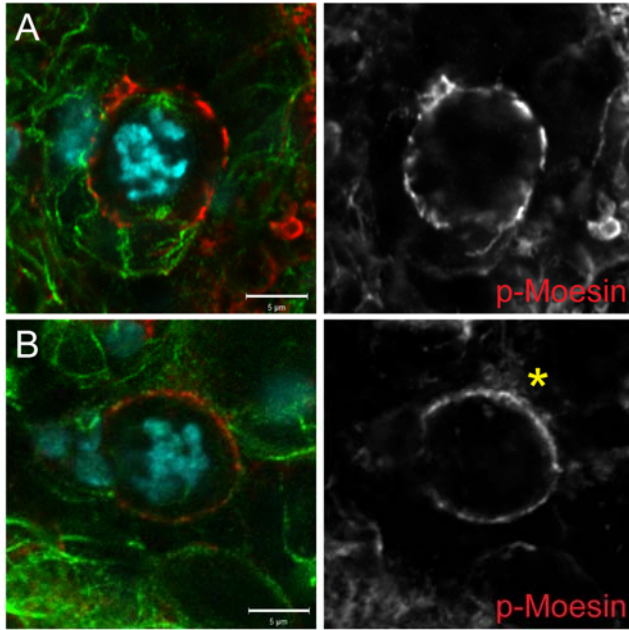

Supplementary Figure 1.  
Abeyesundara, N., *et al.*

**Supplementary Figure 1.** Asymmetric distribution of phosphorylated Moesin is likely established at the prophase to metaphase transition. Phosphorylated Moesin (p-Moesin) localization is (A) uniform and discontinuous at the cortex in 75% of  $w^{118}$  prophase neuroblasts and (B) polar in 25% of  $w^{118}$  prophase neuroblasts ( $n=20$ ; yellow asterisk). Merged panels show anti-p-Moesin (red), anti-phospho-histone H3 (cyan), and anti- $\alpha$ -tubulin (green). All panels shown are single focal plane images. Scale bars represent 5  $\mu\text{m}$ .

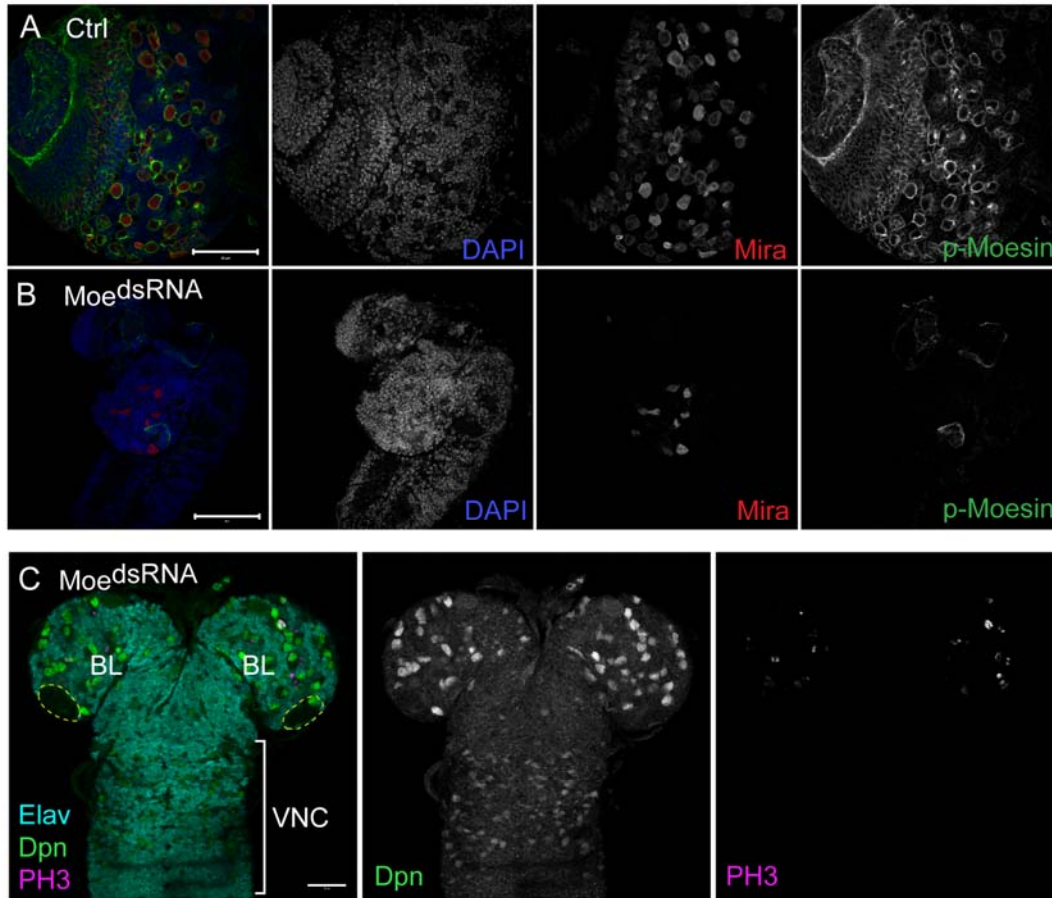

Supplementary Figure 2.  
Abeyesundara, N., et al.

**Supplementary Figure 2.** Reduced Moesin levels using *Insc-GAL4* display defects in neuroblast proliferation and optic lobe development. Larval CNS isolated from progeny of *UAS-Dicer;;UAS-Moe<sup>dsRNA</sup>* crossed to *w<sup>1118</sup>* (Ctrl) and *Insc-GAL4* (*Moe<sup>dsRNA</sup>*). (A) A single control larval brain lobe is shown. (B) Two larval brain lobes and the ventral nerve cord of the *Moe<sup>dsRNA</sup>* are shown. The p-Moesin signal was largely reduced in the *Moe<sup>dsRNA</sup>* larval neuroblasts. (A-B) Merged panels show DAPI (blue), anti-Miranda (Mira; red), and anti-p-Moesin (green). (C) Larval brain lobes (BL) and the thoracic region of the ventral nerve cord (VNC) from *Moe<sup>dsRNA</sup>* larvae at 96 hours ALH. Deadpan (Dpn)-positive and phospho-histone H3 (PH3)-positive neuroblasts are present within the brain lobes, however no mitotic neuroblasts are observed in the thoracic region (87%, *n*=30 larvae) at 96 hours ALH. Yellow dashed line outlines optic lobe primordium. (C)

Merged panel shows anti-Elav (cyan), anti-Dpn (green), and anti-PH3 (magenta). Scale bars represent (A-B) 50  $\mu\text{m}$  and (C) 20  $\mu\text{m}$ .

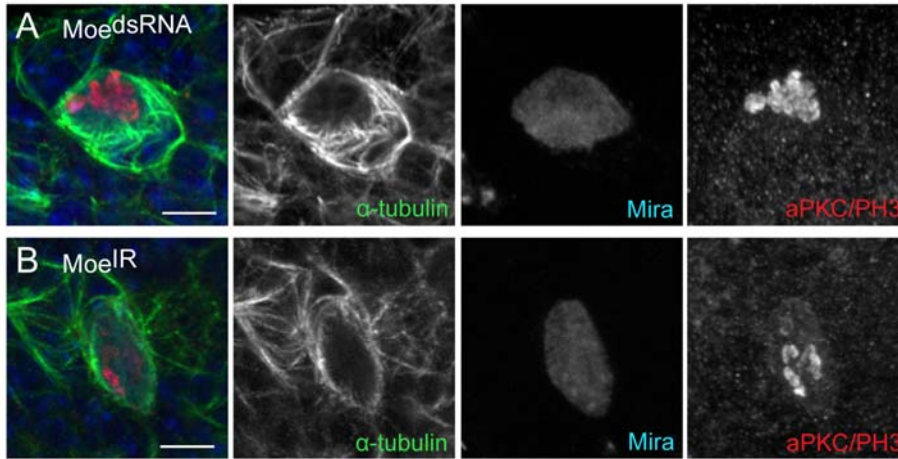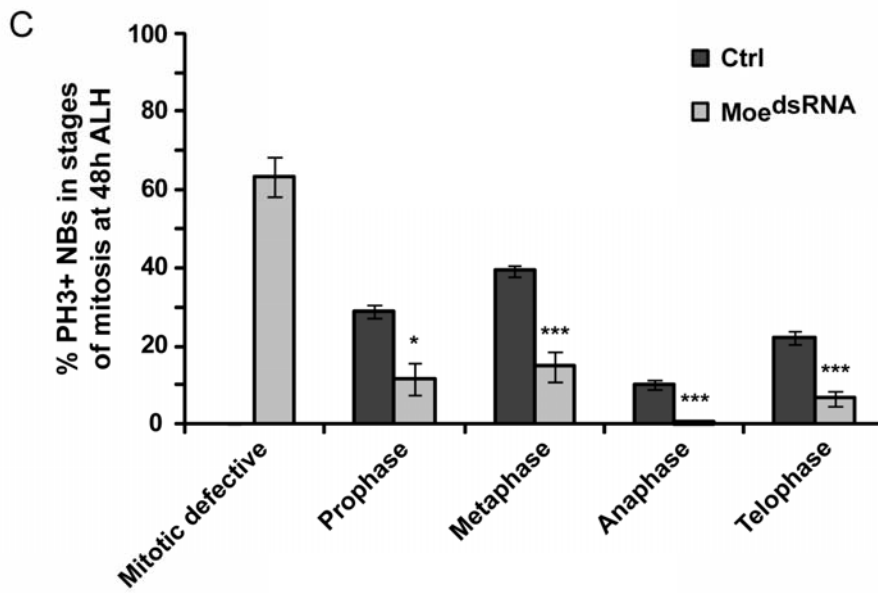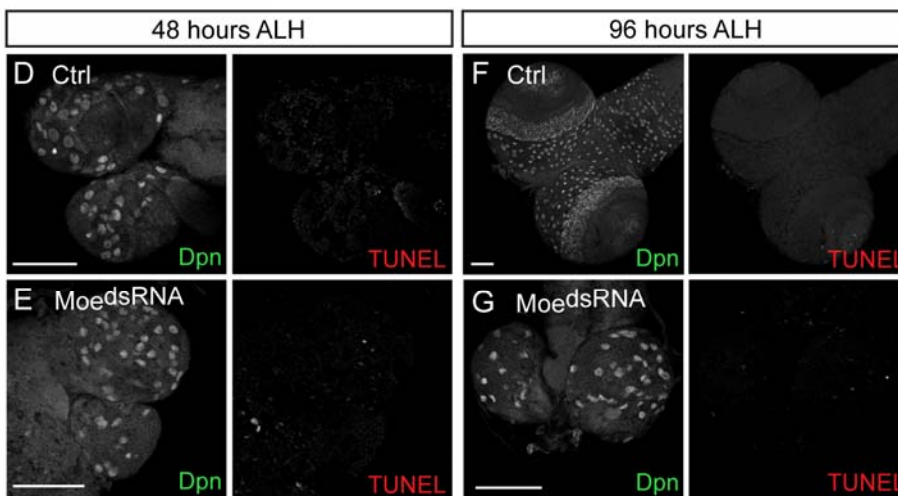

Supplementary Figure 3.  
Abeyesundara, N., *et al.*

**Supplementary Figure 3.** Mitotic defective neuroblasts are observed with reduced Moesin levels. Mitotic defective neuroblasts observed in larval brains isolated from *Insc-GAL4* crossed to (A) *UAS-Dicer;;UAS-Moe<sup>dsRNA</sup>* (*Moe<sup>dsRNA</sup>*) and (B) *UAS-Dicer;;UAS-Moe.IR.327-775*(*Moe<sup>IR</sup>*). (A-B) Mitotic defective neuroblasts are PH3-positive but lack spindle poles ( $\alpha$ -tubulin panel), even though the nuclear envelope appears broken down (Mira panels). Merged panels show DAPI (blue), anti- $\alpha$ -tubulin (green), anti-aPKC/PH3 (red), and anti-Miranda (Mira; cyan). Gray-scale panels of Mira and aPKC/PH3 are maximum intensity projections and the  $\alpha$ -tubulin panels are single focal plane images. (C) The mean proportion of PH3-positive, Dpn-positive cells undergoing the specific stages of mitosis per central brain lobe of Control ( $n=22$ ) and *Moe<sup>dsRNA</sup>* ( $n=34$ ) at 48 hours ALH. In control brain lobes, the mean proportions ( $\pm$  standard error) of mitotic neuroblasts in the specific stages are  $28.7 \pm 1.6\%$  (prophase),  $39.2 \pm 1.6\%$  (metaphase),  $10.1 \pm 1.3\%$  (anaphase), and  $22.0 \pm 1.7\%$  (telophase). In *Moe<sup>dsRNA</sup>* brain lobes, the mean proportions ( $\pm$  standard error) of mitotic neuroblasts are  $63.5 \pm 5.1\%$  (mitotic defective),  $11.6 \pm 3.9\%$  (prophase),  $14.8 \pm 3.8\%$  (metaphase),  $0.4 \pm 0.4\%$  (anaphase), and  $6.7 \pm 2.0\%$  (telophase). (D-G) Control and *Moe<sup>dsRNA</sup>* larval brains fluorescently labelled with anti-Dpn and TUNEL at (D-E) 48 hours and (F-G) 96 hours ALH. Scale bars represent (A-B)  $5 \mu\text{m}$  and (D-G)  $50 \mu\text{m}$ . \*represents  $p < 0.05$  and \*\*\*represents  $p < 0.0001$  using unpaired  $t$  test.

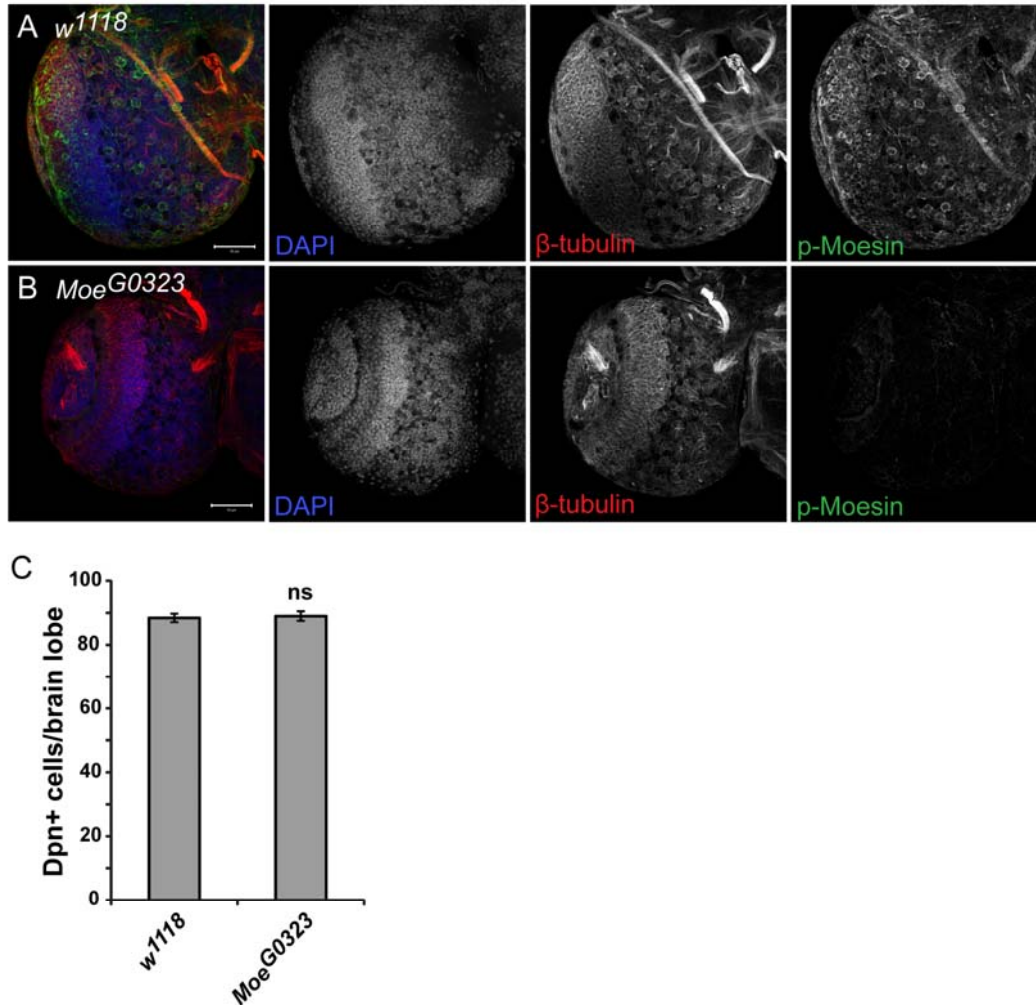

Supplementary Figure 4.  
Abeyundara, N., et al.

**Supplementary Figure 4.** *Moesin* hypomorphic mutant larval brains display reduced phosphorylated Moesin signal and normal brain morphology. (A) *w<sup>1118</sup>* and (B) *Moe<sup>G0323</sup>* third instar larval brains labelled with DAPI (blue), anti- $\beta$ -tubulin (red), and anti-p-Moesin (green) show normal brain morphology in the *Moe<sup>G0323</sup>* mutant, compared to controls. (C) The mean number of Dpn-positive cells per central brain lobe in *w<sup>1118</sup>* ( $n=27$ ) and *Moe<sup>G0323</sup>* ( $n=26$ ). Scale bars represent 50  $\mu$ m. ns=not significant using unpaired *t* test.
